# Supplementary material for: Origanum majorana Essential Oil Triggers p38 MAPK-Mediated Protective Autophagy, Apoptosis, and Caspase-Dependent Cleavage of P70S6K in Colorectal Cancer Cells
Source: PubMed Central journal article supplement (PMC7175132; doi:10.3390/biom10030412), 2020-03-06
Supplement: biomolecules-10-00412-s001.pdf [file biomolecules-10-00412-s001.pdf]

## ***Supplementary material***

***Origanum majorana* Essential Oil triggers a p38 MAPK–mediated protective autophagy, apoptosis and caspase-dependent cleavage of p70S6K in colorectal cancer cells**

Khawlah Athamneh<sup>1q</sup>, Aysha Alneyadi<sup>1q</sup>, Halima Alsamri<sup>1q</sup>, Asma Alrashedi<sup>1</sup>, Abdulrasheed Palakott<sup>1</sup>, Khaled A. El-Tarabily<sup>1</sup>, Ali Eid<sup>2</sup>, Yusra Al Dhaheri<sup>1</sup> and Rabah Iratni<sup>1\*</sup>

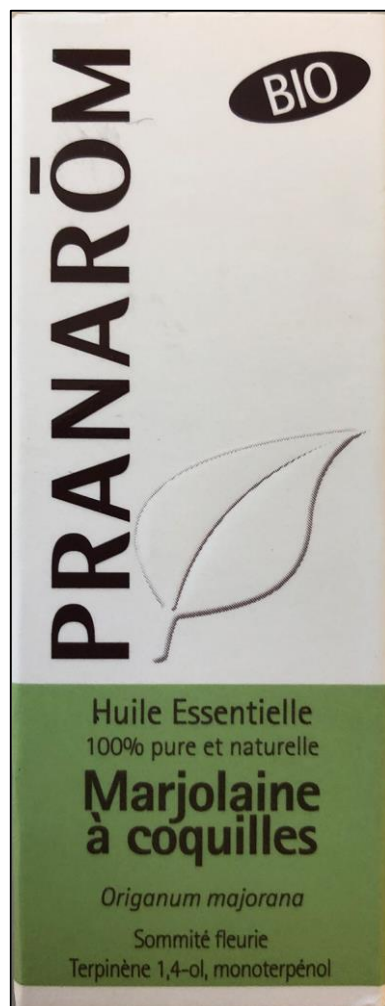

**Supplementary Figure 1.** Commercial *Origanum majorana* essential oil brand used in this study.

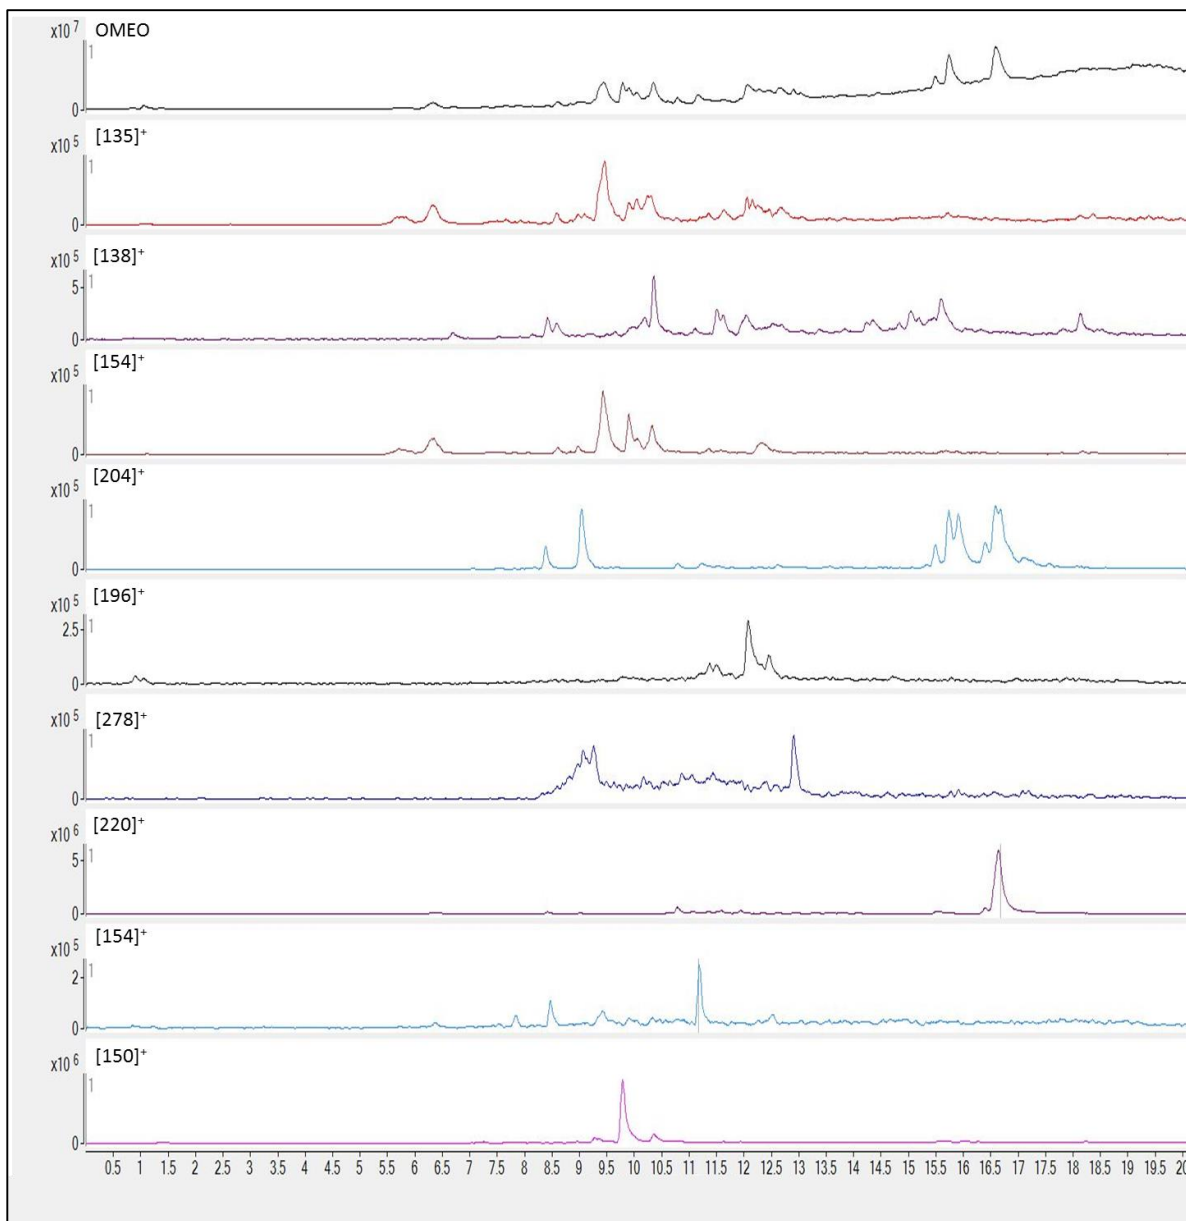

| Mass | Possible Compounds                                |
|------|---------------------------------------------------|
| 135  | Alpha-Pinene, Camphene, p-Cymol, alpha-terpinene  |
| 138  | Cis-sabinene hydrate                              |
| 150  | Pinocarvone                                       |
| 154  | Terpinen-4-ol, alpha-Terpinol                     |
| 155  | P-Meth-2-en-l-ol, Borneol                         |
| 196  | Terpenyl-acetate, Linalyl-acetate                 |
| 204  | B-Caryophyllene, Bicyclogermacrene, Viridoflorene |
| 220  | Spathulenol, Caryophyllene oxide                  |
| 278  | Neophytadiene                                     |

**Supplementary Figure 2.** Chromatograms (A) and names and mass of compounds (B) identified in OMEO by HPLC-MS.
